# Supplementary material for: SBMLmod: a Python-based web application and web service for efficient data integration and model simulation
Source: PubMed Central journal article supplement (PMC5483284; doi:10.1186/s12859-017-1722-9), 2017-06-24

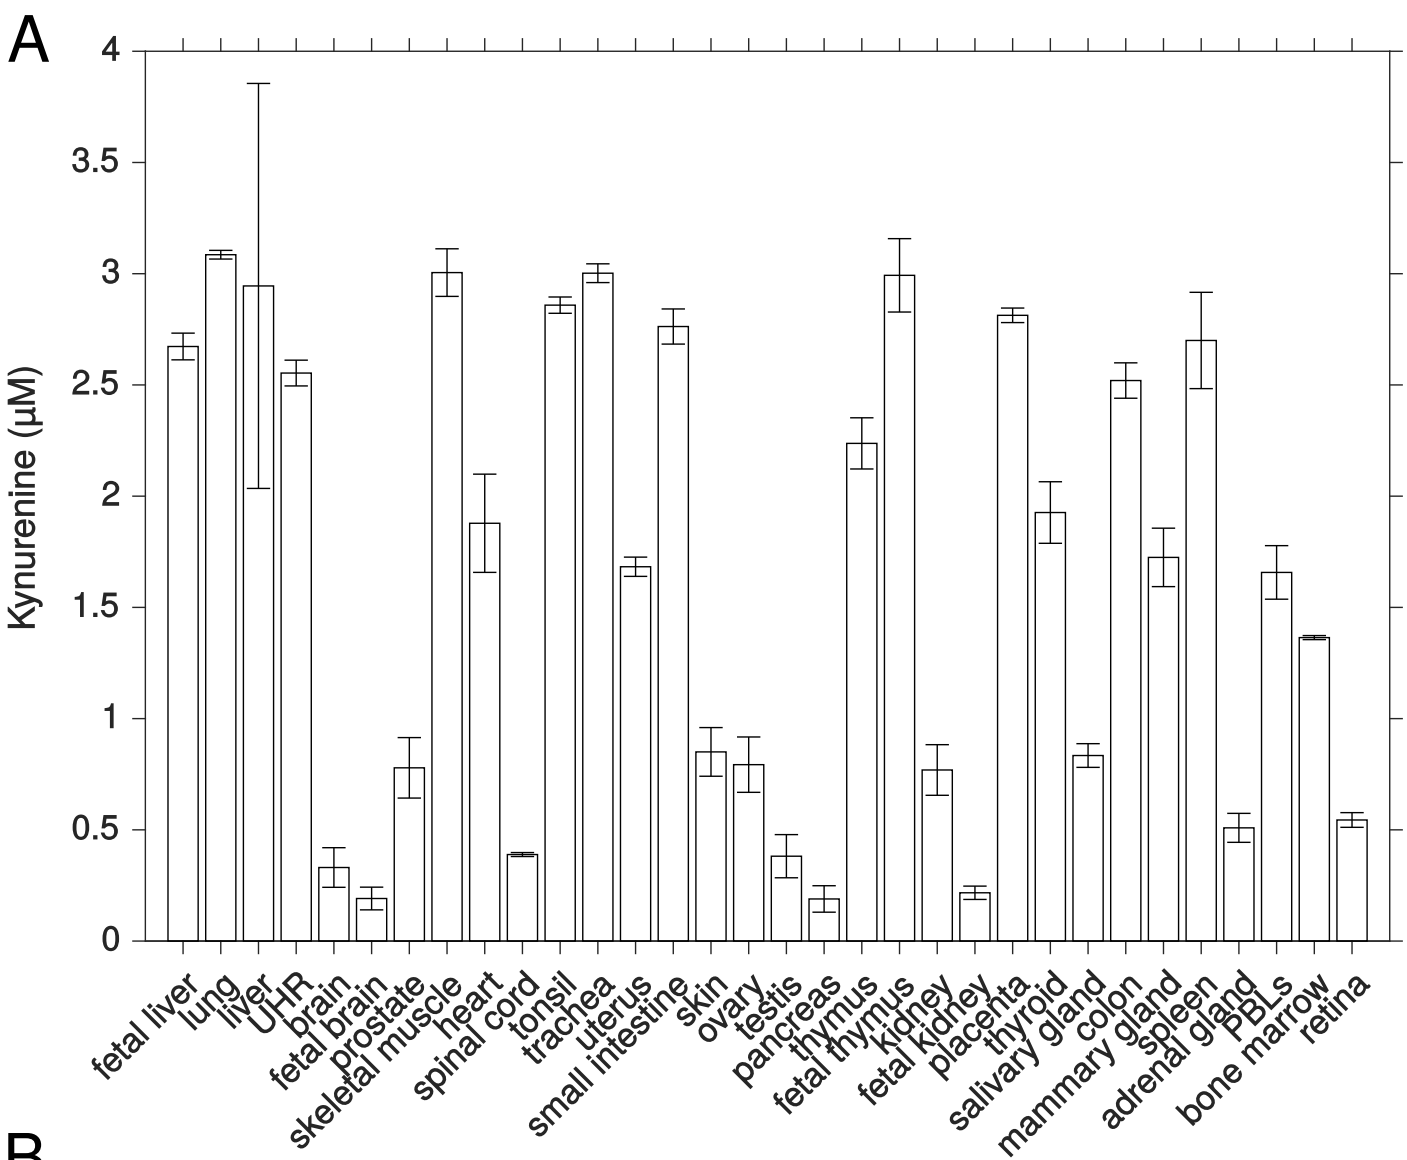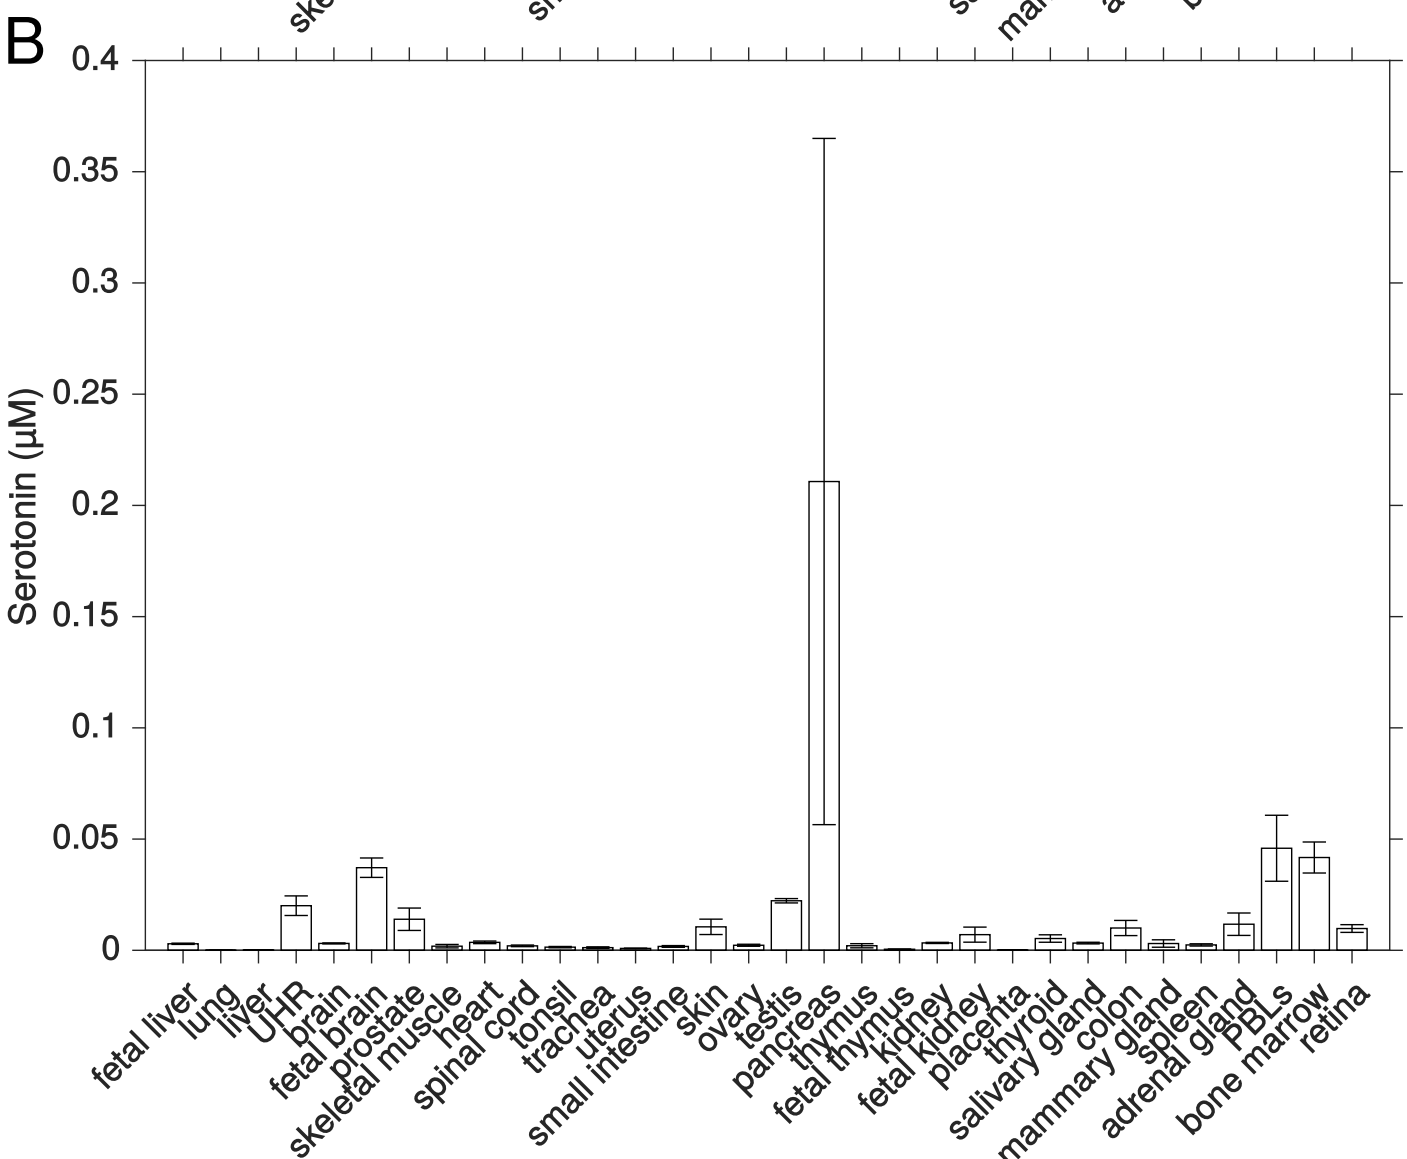

Supplement: 12859_2017_1722_MOESM4_ESM.pdf [file 12859_2017_1722_MOESM4_ESM.pdf]
